# Supplementary material for: Metagenomic Characterization of Microbial Communities In Situ Within the Deeper Layers of the Ileum in Crohn’s Disease
Source: PubMed Central journal article supplement — Cell Mol Gastroenterol Hepatol. 2016 May 26;2(5):563–566.e5. doi: 10.1016/j.jcmgh.2016.05.011 (PMC5042890; doi:10.1016/j.jcmgh.2016.05.011), 2016-05-26
Supplement: mmc1.pdf [file mmc1.pdf]

Supplementary Table 1) Cohort information and overview of clinical covariates.

| PRISM number | Group # | Montreal | Age at dx | Age at surgery | Sx Date    | Interval | Sx      | Indication  | Granuloma              | LN       | Abscess | Fistula | Stricture | Antibiotics                                               | IBD ileitis                             | Genetics                                 | Accession # | Involved # | Involved CCM # | Number bacterial reads involved | Uninvolved CD # | Uninvolved CCM # | Number bacterial reads uninvolved |
|--------------|---------|----------|-----------|----------------|------------|----------|---------|-------------|------------------------|----------|---------|---------|-----------|-----------------------------------------------------------|-----------------------------------------|------------------------------------------|-------------|------------|----------------|---------------------------------|-----------------|------------------|-----------------------------------|
| 7116         | 2       | A2L3B2   | 37        | 40             | 4/6/2007   | 39m      | ileocol | Stricturing | Yes                    | Yes (4)  | No      | No      | Yes       | Metronidazole OR                                          | AZA x 38m, ASA/Entocort prev            | ATG <sup>int</sup>                       | MS07K20764  | CD-I-5     | CC-M-067       | 671                             | CD-U-2          | CC-M-066         | 742                               |
| 7186         | 1       | A2L1B3   | 34        | 34             | 1/21/2004  | 1m       | ileocol | Penetrating | No                     | Yes (10) | Yes     | No      | No        | Levofloxacin or Metronidazole x 7 days                    | Pred x 7d                               | ATG <sup>int</sup>                       | S04T3814    | CD-I-20    | CC-M-069       | 1323                            | CD-U-17*        | CC-M-068*        | NA                                |
| 7067         | 1       | A3L1B3   | 43        | 42             | 4/29/2005  | 1m       | ileocol | Penetrating | No                     | -        | No      | No      | No        | Ciprofloxacin or Metronidazole x 2 weeks                  | Pred x 11d                              | NOD908 <sup>int</sup>                    | MS05X21847  | CD-I-25    | CC-M-071       | 2206                            | CD-U-22         | CC-M-070         | 795                               |
| 7968         | 2       | A3L1B2p  | 45        | 50             | 12/1/2009  | 56m      | ileocol | Stricturing | No                     | -        | No      | Yes     | Yes       | Ciprofloxacin or metronidazole x 3 weeks, Ancef/Flagyl OR | AZA 12m, Pred 12m                       | NODis <sup>int</sup> ATG <sup>int</sup>  | MS09M77373  | CD-I-65    | CC-M-073       | 260                             | CD-U-63         | CC-M-072         | 509                               |
| 7522         | 2       | A2L1B3   | 20        | 22             | 2/6/2007   | 32m      | ileocol | Penetrating | No                     | Yes (3)  | No      | Yes     | No        | Metronidazole x 4 months                                  | ASA x 20m, AZA x 10m, Pred x 4m         | WT                                       | MS07J08038  | CD-I-56    | CC-M-075       | 473                             | CD-U-53         | CC-M-074         | 2629                              |
| 7952         | 1       | A3L3B3   | 62        | 62             | 8/31/2007  | 6m       | ileocol | Penetrating | No                     | Yes (1)  | Yes     | No      | No        | Levofloxacin / Metronidazole x 1 month                    | Pred x 1m                               | ATG <sup>int</sup>                       | MS07J52737  | CD-I-59    | CC-M-077       | 277                             | CD-U-58         | CC-M-076         | 19445                             |
| 7141         | 2       | A2L1B3   | 26        | 28             | 1/7/2006   | 28m      | ileocol | Penetrating | -                      | Yes      | No      | Yes     | Yes       | Ciprofloxacin x 8 months, Metronidazole x 1 week          | ASA x 26m, AZA x 25m, IFX x 12m         | ATG <sup>int</sup>                       | MS06K01147  | CD-I-11    | CC-M-088       | 7871                            | CD-U-9          | CC-M-094         | 7586                              |
| 7063         | 2       | A3L3B3   | 45        | 47             | 10/16/2002 | 27m      | ileocol | Penetrating | -                      | Yes (8)  | No      | Yes     | No        | Metronidazole prev, Abx at OR                             | ASA, AZA, MTX, IFX (2) prev, none at OR | WT                                       | S02B56615   | CD-I-16    | CC-M-090       | 7841                            | CD-U-13         | CC-M-089         | 14248                             |
| 7433         | 2       | A2L3B3   | 17        | 19             | 1/6/2003   | 29m      | ileocol | Penetrating | Yes (+++, necrotizing) | Yes (9)  | No      | Yes     | Yes       | Ciprofloxacin or Metronidazole x years                    | ASA x 29m, AZA x 18m                    | WT                                       | S03X724     | CD-I-51    | CC-M-092       | 10024                           | CD-U-47         | CC-M-091         | 10757                             |
| 7031         | 1       | A2L3B3   | 20        | 21             | 3/29/2000  | 19m      | ileocol | Penetrating | -                      | -        | No      | Yes     | Yes       | Abx on and off(?), at OR                                  | ASA                                     | NOD702 <sup>int</sup>                    | S00D15285   | CD-I-36    | CC-M-096       | 3168                            | CD-U-32         | CC-M-095**       | 9704                              |
| 7600         | 1       | A2L3B3p  | 30        | 29             | 12/10/2007 | 5m       | ileocol | Penetrating | Yes                    | Yes (1)  | Yes     | Yes     | No        | multiple x 6 months, drain                                | 6MP x 1m                                | NOD908 <sup>int</sup> ATG <sup>int</sup> | MS07M74450  | CD-I-78    | CC-M-097       | 5858                            | CD-U-76         | CC-M-093         | 5837                              |
| 7865         | 1       | A2L1B3   | 32        | 31             | 2/23/2009  | 1m       | ileocol | Penetrating | -                      | -        | Yes     | Yes     | No        | Ciprofloxacin or Metronidazole x 1 month                  | No                                      | NOD908 <sup>int</sup> ATG <sup>int</sup> | MS09T11392  | CD-I-82    | CC-M-099       | 12381                           | CD-U-81         | CC-M-098         | 10876                             |

Red case – no uninvolved area (so eliminated from uninvs. involv comp); blue case – macrodissected uninvolved area from inflamed block
