# Supplementary material for: Metagenomic Characterization of Microbial Communities In Situ Within the Deeper Layers of the Ileum in Crohn’s Disease
Source: PubMed Central journal article supplement — Cell Mol Gastroenterol Hepatol. 2016 May 26;2(5):563–566.e5. doi: 10.1016/j.jcmgh.2016.05.011 (PMC5042890; doi:10.1016/j.jcmgh.2016.05.011), 2016-05-26
Supplement: mmc2.pdf [file mmc2.pdf]

Supplementary Table 2) Classification of reads from whole genome shotgun sequencing.

| Sample location                         | Involved | Uninvolved | Involved  | Uninvolved |
|-----------------------------------------|----------|------------|----------|------------|----------|------------|----------|------------|----------|------------|-----------|------------|
| Sequencing sample ID                    | CC-M-067 | CC-M-066   | CC-M-071 | CC-M-070   | CC-M-073 | CC-M-072   | CC-M-075 | CC-M-074   | CC-M-077 | CC-M-076   | CC-M-088  | CC-M-094   |
| Sample ID                               | CD-I-5   | CD-U-2     | CD-I-25  | CD-U-22    | CD-I-65  | CD-U-63    | CD-I-56  | CD-U-53    | CD-I-59  | CD-U-58    | CD-I-11   | CD-U-9     |
| Read Length                             | 100      | 100        | 100      | 100        | 100      | 100        | 100      | 100        | 100      | 100        | 100       | 100        |
| Total number of reads                   | 65196446 | 58497580   | 89099732 | 81481942   | 49797264 | 57998298   | 66843642 | 75664790   | 50405638 | 107033092  | 107071062 | 91506374   |
| Low quality reads (removed)             | 17163097 | 15283097   | 25905262 | 21456670   | 11698725 | 12526822   | 13152964 | 15088967   | 10521477 | 21884440   | 30172510  | 26369234   |
| Duplicate / repeat reads                | 1703651  | 1610262    | 3255461  | 2786171    | 957897   | 898760     | 754027   | 1254386    | 580562   | 1344731    | 7864823   | 5989392    |
| Human reads                             | 46322100 | 41597052   | 59924269 | 57230333   | 37137198 | 44568226   | 52931642 | 59309764   | 39300509 | 83775123   | 68998495  | 59113085   |
| Known bacterial reads                   | 671      | 742        | 2206     | 795        | 260      | 509        | 473      | 2629       | 277      | 19445      | 7871      | 7586       |
| Known other reads (Archaea, Fungi, etc) | 11       | 13         | 17       | 15         | 6        | 13         | 5        | 15         | 3        | 18         | 32        | 16         |
| Known viral / phage reads               | 1        | 7          | 10       | 11         | 72       | 3          | 3        | 7          | 2        | 89         | 8         | 9          |
| Unmapped reads                          | 6915     | 6407       | 12507    | 7948       | 3106     | 3965       | 4528     | 9022       | 2808     | 9246       | 27323     | 27052      |

| Sample location                         | Involved | Uninvolved | Involved | Uninvolved | Involved | Uninvolved* | Involved  | Uninvolved | Involved | Uninvolved | **Proximal margin |
|-----------------------------------------|----------|------------|----------|------------|----------|-------------|-----------|------------|----------|------------|-------------------|
| Sequencing sample ID                    | CC-M-090 | CC-M-089   | CC-M-092 | CC-M-091   | CC-M-096 | CC-M-095    | CC-M-097  | CC-M-093   | CC-M-099 | CC-M-098   | CC-M-069          |
| Sample ID                               | CD-I-16  | CD-U-13    | CD-I-51  | CD-U-47    | CD-I-36  | CD-U-32     | CD-I-78   | CD-U-76    | CD-I-82  | CD-U-81    | CD-I-20           |
| Read Length                             | 100      | 100        | 100      | 100        | 100      | 100         | 100       | 100        | 100      | 100        | 100               |
| Total number of reads                   | 46063398 | 57306784   | 57505252 | 83525914   | 45601516 | 35595524    | 160018990 | 111195604  | 67282074 | 67506916   | 75904148          |
| Low quality reads (removed)             | 13286967 | 16512255   | 15573178 | 22630712   | 10352888 | 8739436     | 39002030  | 29469424   | 19049423 | 19718651   | 19745534          |
| Duplicate / repeat reads                | 3937351  | 6242635    | 5397054  | 6876296    | 3167204  | 3255911     | 8731082   | 4572432    | 4772306  | 3644714    | 2150294           |
| Human reads                             | 28819807 | 34492091   | 36489494 | 53968002   | 32067900 | 23575877    | 112258683 | 77127127   | 43414446 | 44100996   | 53998459          |
| Known bacterial reads                   | 7841     | 14248      | 10024    | 10757      | 3168     | 9704        | 5858      | 5837       | 12381    | 10876      | 1323              |
| Known other reads (Archaea, Fungi, etc) | 30       | 48         | 28       | 106        | 14       | 60          | 17        | 26         | 21       | 30         | 11                |
| Known viral / phage reads               | 4        | 28         | 18       | 15         | 857      | 639         | 7         | 6          | 20       | 23         | 2                 |
| Unmapped reads                          | 11398    | 45479      | 35456    | 40026      | 9485     | 13897       | 21313     | 20752      | 33477    | 31626      | 8525              |

| Sample location                         | IBD-free  | IBD-free | IBD-free | IBD-free | IBD-free | IBD-free | IBD-free | IBD-free | IBD-free | IBD-free | IBD-free | IBD-free |
|-----------------------------------------|-----------|----------|----------|----------|----------|----------|----------|----------|----------|----------|----------|----------|
| Sequencing sample ID                    | CCM146    | CCM147   | CCM148   | CCM149   | CCM150   | CCM151   | CCM152   | CCM153   | CCM154   | CCM155   | CCM156   | CCM157   |
| Sample ID                               | TI-N02    | TI-N04   | TI-N06   | TI-N08   | TI-N10   | TI-N12   | TI-N14   | TI-N16   | TI-N18   | TI-N20   | TI-N22   | TI-N24   |
| Read Length                             | 101       | 101      | 101      | 101      | 101      | 101      | 101      | 101      | 101      | 101      | 101      | 101      |
| Total number of reads                   | 298152056 | 28561816 | 26112868 | 30443438 | 32621480 | 20919238 | 21599392 | 24398862 | 37615244 | 20988402 | 33136006 | 27305124 |
| Low quality reads (removed)             | 78768968  | 8219766  | 7127159  | 7863157  | 9633610  | 5473606  | 5960687  | 5645193  | 11021830 | 5700834  | 9358261  | 6787264  |
| Duplicate / repeat reads                | 30468221  | 894398   | 719835   | 1420165  | 2222398  | 890885   | 758666   | 758418   | 2954760  | 770623   | 1846587  | 814272   |
| Human reads                             | 188871539 | 19444184 | 18263349 | 21150617 | 20754851 | 14550225 | 14875327 | 17992893 | 23554203 | 14507905 | 21920313 | 19698369 |
| Known bacterial reads                   | 4256      | 250      | 301      | 2330     | 1943     | 475      | 951      | 244      | 5925     | 2645     | 2208     | 805      |
| Known other reads (Archaea, Fungi, etc) | 78        | 9        | 9        | 5        | 13       | 6        | 12       | 2        | 50       | 23       | 13       | 6        |
| Known viral / phage reads               | 8         | 1        | 0        | 12       | 5        | 4        | 5        | 2        | 10       | 5        | 9        | 0        |
| Unmapped reads                          | 38986     | 3208     | 2215     | 7152     | 8660     | 4037     | 3744     | 2110     | 78466    | 6367     | 8615     | 4408     |

\* histopath uninv. Included

\*\* don't have uninvolved sample

Known other reads - Archaea, Fungi, Cloning vector, etc
