# Supplementary material for: Metagenomic Characterization of Microbial Communities In Situ Within the Deeper Layers of the Ileum in Crohn’s Disease
Source: PubMed Central journal article supplement — Cell Mol Gastroenterol Hepatol. 2016 May 26;2(5):563–566.e5. doi: 10.1016/j.jcmgh.2016.05.011 (PMC5042890; doi:10.1016/j.jcmgh.2016.05.011), 2016-05-26
Supplement: mmc3.pdf [file mmc3.pdf]

Supplementary Table 3) Viral read counts in involved and uninvolved ileum segments of Crohn's patients and IBD-free individuals.

| Sample ID | Sequencing Sample ID | Viral hits                                  | No. of reads |
|-----------|----------------------|---------------------------------------------|--------------|
| CD-U-2    | CC-M-066             | Propionibacterium phage                     | 5            |
| CD-U-2    | CC-M-066             | Yersinia phage                              | 2            |
| CD-I-5    | CC-M-067             | Bacteriophage                               | 1            |
| CD-U-22   | CC-M-070             | Enterococcus phage                          | 9            |
| CD-U-22   | CC-M-070             | Propionibacterium phage                     | 2            |
| CD-I-25   | CC-M-071             | Enterococcus phage                          | 8            |
| CD-I-25   | CC-M-071             | Propionibacterium phage                     | 2            |
| CD-U-63   | CC-M-072             | Enterobacteria phage                        | 3            |
| CD-I-65   | CC-M-073             | Enterobacteria phage                        | 69           |
| CD-I-65   | CC-M-073             | Human herpesvirus 7                         | 2            |
| CD-I-65   | CC-M-073             | Coliphage                                   | 1            |
| CD-U-53   | CC-M-074             | Human herpesvirus 6B                        | 2            |
| CD-U-53   | CC-M-074             | Enterobacteria phage                        | 2            |
| CD-U-53   | CC-M-074             | Human herpesvirus 7                         | 2            |
| CD-U-53   | CC-M-074             | Enterococcus phage                          | 1            |
| CD-I-56   | CC-M-075             | Staphylococcus phage                        | 1            |
| CD-I-56   | CC-M-075             | Enterococcus phage                          | 2            |
| CD-U-58   | CC-M-076             | Enterococcus phage                          | 88           |
| CD-U-58   | CC-M-076             | Staphylococcus phage                        | 1            |
| CD-I-11   | CC-M-088             | Burkholderia phage                          | 2            |
| CD-I-11   | CC-M-088             | Human herpesvirus 4                         | 3            |
| CD-I-11   | CC-M-088             | Propionibacterium phage                     | 2            |
| CD-I-11   | CC-M-088             | Enterobacteria phage                        | 1            |
| CD-U-9    | CC-M-094             | Lactococcus phage                           | 2            |
| CD-U-9    | CC-M-094             | Pseudomonas aeruginosa phage                | 1            |
| CD-U-9    | CC-M-094             | Burkholderia phage                          | 5            |
| CD-U-9    | CC-M-094             | Ralstonia phage                             | 1            |
| CD-I-16   | CC-M-090             | Enterobacteria phage                        | 2            |
| CD-I-16   | CC-M-090             | Autographa californica nucleopolyhedrovirus | 2            |
| CD-U-13   | CC-M-089             | Propionibacterium phage                     | 2            |
| CD-U-13   | CC-M-089             | Human adenovirus                            | 4            |
| CD-U-13   | CC-M-089             | Burkholderia phage                          | 15           |
| CD-U-13   | CC-M-089             | Ralstonia phage                             | 5            |
| CD-U-13   | CC-M-089             | Lactococcus phage                           | 1            |
| CD-U-13   | CC-M-089             | Pseudomonas phage                           | 1            |
| CD-I-51   | CC-M-092             | Lactococcus phage                           | 3            |
| CD-I-51   | CC-M-092             | Burkholderia phage                          | 8            |
| CD-I-51   | CC-M-092             | Ralstonia phage                             | 5            |
| CD-I-51   | CC-M-092             | Bacteriophage                               | 1            |
| CD-I-51   | CC-M-092             | Propionibacterium phage                     | 1            |
| CD-U-47   | CC-M-091             | Propionibacterium phage                     | 4            |
| CD-U-47   | CC-M-091             | Enterobacteria phage                        | 1            |
| CD-U-47   | CC-M-091             | Lactococcus phage                           | 3            |
| CD-U-47   | CC-M-091             | Staphylococcus phage                        | 2            |
| CD-U-47   | CC-M-091             | Erwinia phage                               | 1            |
| CD-U-47   | CC-M-091             | Burkholderia phage                          | 3            |
| CD-U-47   | CC-M-091             | Ralstonia phage                             | 1            |
| CD-I-36   | CC-M-096             | Human herpesvirus 6                         | 857          |
| CD-U-32   | CC-M-095             | Human herpesvirus 6                         | 634          |
| CD-U-32   | CC-M-095             | Human herpesvirus 7                         | 2            |
| CD-U-32   | CC-M-095             | Human adenovirus                            | 1            |
| CD-U-32   | CC-M-095             | Enterobacteria phage                        | 2            |
| CD-I-78   | CC-M-097             | Enterobacteria phage                        | 1            |
| CD-I-78   | CC-M-097             | Burkholderia phage                          | 5            |
| CD-I-78   | CC-M-097             | Lactococcus bacteriophage                   | 1            |
| CD-U-76   | CC-M-093             | Thermus phage                               | 2            |
| CD-U-76   | CC-M-093             | Burkholderia phage                          | 3            |
| CD-U-76   | CC-M-093             | Human herpesvirus 6                         | 1            |
| CD-I-82   | CC-M-099             | Burkholderia phage                          | 8            |
| CD-I-82   | CC-M-099             | Propionibacterium phage                     | 3            |
| CD-I-82   | CC-M-099             | Human herpesvirus 6                         | 2            |
| CD-I-82   | CC-M-099             | Lactococcus phage                           | 3            |
| CD-I-82   | CC-M-099             | Bacteriophage                               | 1            |
| CD-I-82   | CC-M-099             | Staphylococcus phage                        | 2            |
| CD-I-82   | CC-M-099             | Burkholderia cenocepacia phage              | 1            |
| CD-U-81   | CC-M-098             | Burkholderia phage                          | 6            |
| CD-U-81   | CC-M-098             | Burkholderia cenocepacia phage              | 2            |
| CD-U-81   | CC-M-098             | Enterobacteria phage                        | 8            |
| CD-U-81   | CC-M-098             | Lactococcus phage                           | 4            |
| CD-U-81   | CC-M-098             | Pseudomonas phage                           | 2            |
| CD-U-81   | CC-M-098             | Propionibacterium phage                     | 1            |
| CD-I-20   | CC-M-069             | Enterobacteria phage                        | 1            |
| CD-I-20   | CC-M-069             | Burkholderia cepacia phage                  | 1            |
| TI-N02    | CCM146               | Propionibacterium phage                     | 1            |
| TI-N02    | CCM146               | Human herpesvirus 7                         | 2            |
| TI-N02    | CCM146               | Human parvovirus B19                        | 3            |
| TI-N02    | CCM146               | Enterobacteria phage                        | 1            |
| TI-N02    | CCM146               | Yersinia phage                              | 1            |
| TI-N04    | CCM147               | Stenotrophomonas phage                      | 1            |
| TI-N08    | CCM149               | Human herpesvirus 6                         | 11           |
| TI-N08    | CCM149               | Enterobacteria phage                        | 1            |
| TI-N10    | CCM150               | Human herpesvirus 6                         | 1            |
| TI-N10    | CCM150               | Human parvovirus B19                        | 2            |
| TI-N10    | CCM150               | Salmonella phage                            | 1            |
| TI-N10    | CCM150               | Citrobacter phage                           | 1            |
| TI-N12    | CCM151               | Stenotrophomonas phage                      | 2            |
| TI-N12    | CCM151               | Enterobacteria phage                        | 2            |
| TI-N14    | CCM152               | Cronobacter phage                           | 2            |
| TI-N14    | CCM152               | Enterobacteria phage                        | 2            |
| TI-N14    | CCM152               | Bacteriophage                               | 1            |
| TI-N16    | CCM153               | Lactococcus lactis bacteriophage            | 1            |
| TI-N16    | CCM153               | Lactococcus phage                           | 1            |
| TI-N18    | CCM154               | Propionibacterium phage                     | 7            |
| TI-N18    | CCM154               | Citrobacter phage                           | 1            |
| TI-N18    | CCM154               | Salmonella phage                            | 1            |
| TI-N18    | CCM154               | Human papillomavirus type 21                | 1            |
| TI-N20    | CCM155               | Enterobacteria phage                        | 4            |
| TI-N22    | CCM156               | Lactococcus phage                           | 1            |
| TI-N22    | CCM156               | Lactococcus lactis phage                    | 1            |
| TI-N22    | CCM156               | Burkholderia phage                          | 1            |
| TI-N22    | CCM156               | Enterobacteria phage                        | 2            |
